# Supplementary material for: Optimization of Curcumin Nanocrystals as Promising Strategy for Nose-to-Brain Delivery Application
Source: MDPI journal article supplement (doi:10.3390/pharmaceutics12050476), 2020-05-23
Supplement: s1 [file s1]

# Supplementary Materials: Optimization of Curcumin Nanocrystals as Promising Strategy for Nose-to-Brain Delivery Application

Angela Bonaccorso , Maria Rosa Gigliobianco , Rosalia Pellitteri , Debora Santonocito, Claudia Carbone , Piera Di Martino , Giovanni Puglisi and Teresa Musumeci

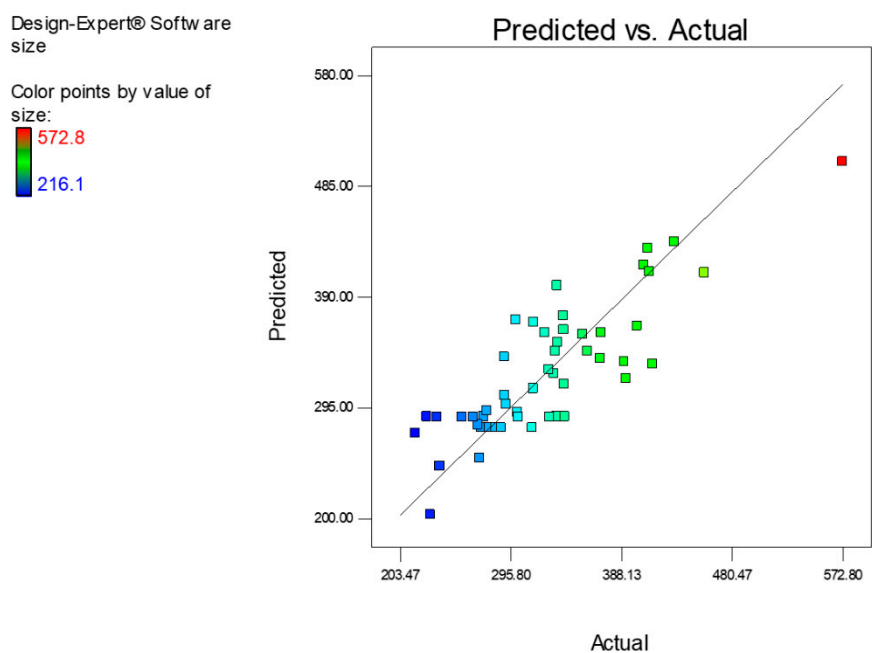

Figure S1. Correlation between predicted and actual values.

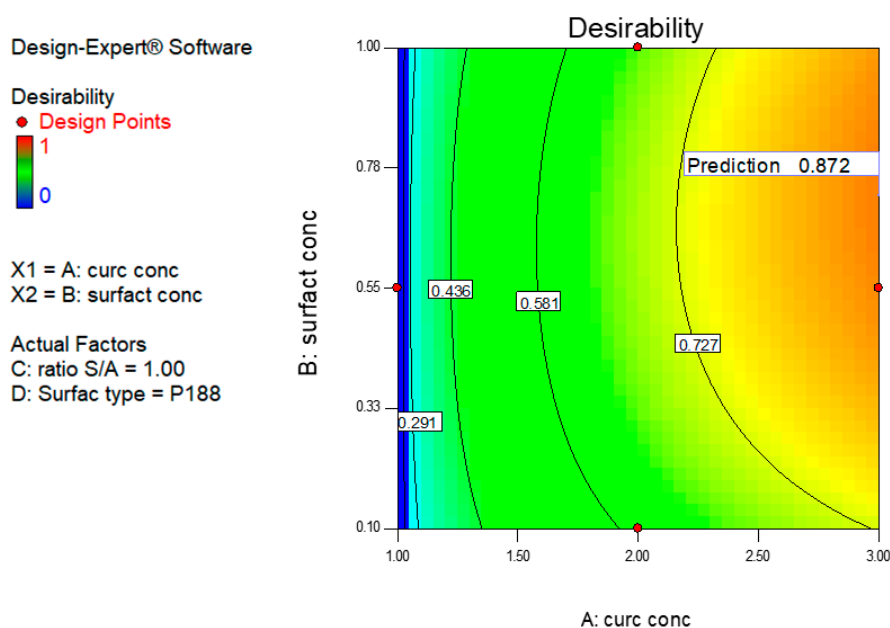

Figure S2. Desirability of optimized formulation.

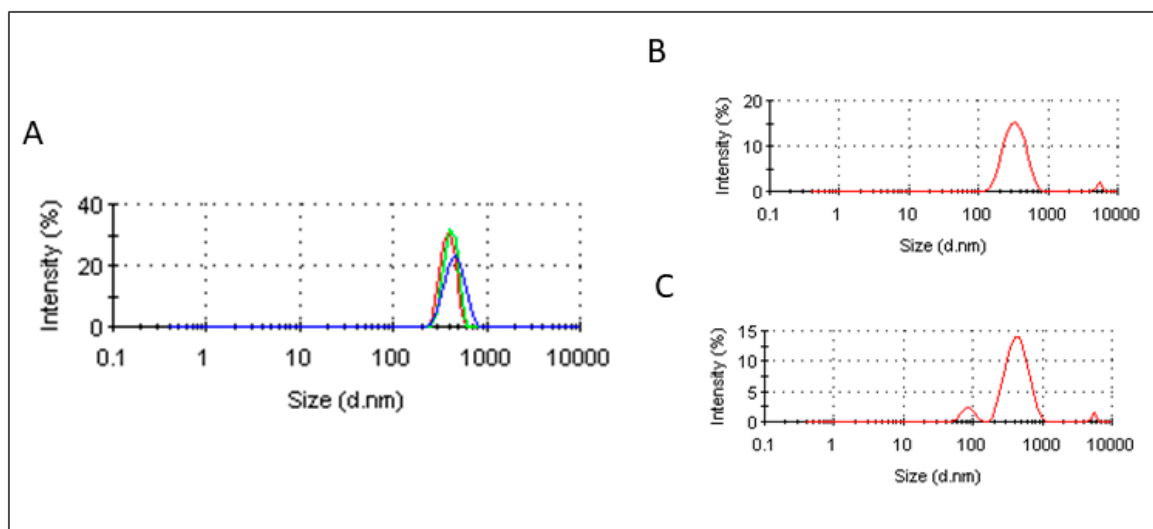

**Figure S3.** Size distribution by intensity of redispersed NCs without cryoprotectant (A), with mannitol 5% w/v (B), and with mannitol 10% w/v (C) after freeze-drying process.
